# Supplementary material for: Deltex1 Polymorphisms Are Associated with Hepatitis B Vaccination Non-Response in Southwest China
Source: PLoS One. 2016 Feb 19;11(2):e0149199. doi: 10.1371/journal.pone.0149199 (PMC4760674; doi:10.1371/journal.pone.0149199)
Supplement: S2 Table — (XLSX) [file pone.0149199.s003.xlsx]

## Sheet: S2 Table
S2 Table. Statistical information regarding the 10 SNPs.
							Using χ2 test		Using exact test
Name	Chr	Position	Call Rate（%）	MAF（infant）	MAF(adult)	MAF(HapMap-HCB)	HWE P Value(infant)	Hwpval(adult)	HWE P Value(infant)	Hwpval(adult)	correct HWE P Value(infant)	correct Hwpval(adult)
rs2254770	12	113494323	100	0.354	0.359	0.335	0.7031	0.3851	0.656262	0.319031	1	1
rs1732786	12	113495646	100	0.358	0.363	0.193	0.899	0.5098	0.897379	0.119501	1	1
rs2384077	12	113504496	100	0.145	0.178	0.117	0.3163	0.7621	0.321157	0.657887	1	1
rs10744794	12	113509628	100	0.204	0.241	0.172	0.0297	0.1645	0.023952	0.149093	0.23952	1
rs1732803	12	113519816	100	0.273	0.296	0.277	0.4271	0.2675	0.410532	0.208853	1	1
rs2731303	12	113523505	100	0.225	0.25	0.263	0.3824	0.0854	0.349933	0.0776502	1	0.776502
rs11066491	12	113524987	99.64	0.21	0.22	0.15	0.764	0.5543	0.711835	0.444564	1	1
rs1619738	12	113526284	100	0.244	0.23	0.2	0.493	0.5989	0.4408	0.575972	1	1
rs2264886	12	113526462	100	0.197	0.18	0.336	0.9433	0.1737	0.859185	0.475909	1	1
rs1732792	12	113530592	100	0.213	0.191	0.167	0.5194	0.6056	0.467466	0.521746	1	1
